# Supplementary material for: Anti-PD-L1 DNA aptamer antagonizes the interaction of PD-1/PD-L1 with antitumor effect
Source: Royal Society of Chemistry journal article supplement (doi:10.1039/d0tb01668c), 2020-11-19
Supplement: d0tb01668c1.pdf [file d0tb01668c1.pdf]

## Supporting Information for

### **Anti-PD-L1 DNA Aptamer Antagonizes the Interaction of PD-1/PD-L1 with Antitumor Effect**

Tian Gao<sup>1,2</sup>, Zheng Mao<sup>2,3</sup>, Wenjing Li<sup>1,2</sup>, Renjun Pei<sup>1,2\*</sup>

<sup>1</sup> School of Nano-Tech and Nano-Bionics, University of Science and Technology of China, Hefei, 230026, China. E-mail: [rjpei2011@sinano.ac.cn](mailto:rjpei2011@sinano.ac.cn).

<sup>2</sup> CAS Key Laboratory of Nano-Bio Interface, Suzhou Institute of Nano-Tech and Nano-Bionics, Chinese Academy of Sciences, Suzhou, 215123, China.

<sup>3</sup> Department of Polymer Materials, School of Materials Science and Engineering, Shanghai University, Shanghai, 200444, China

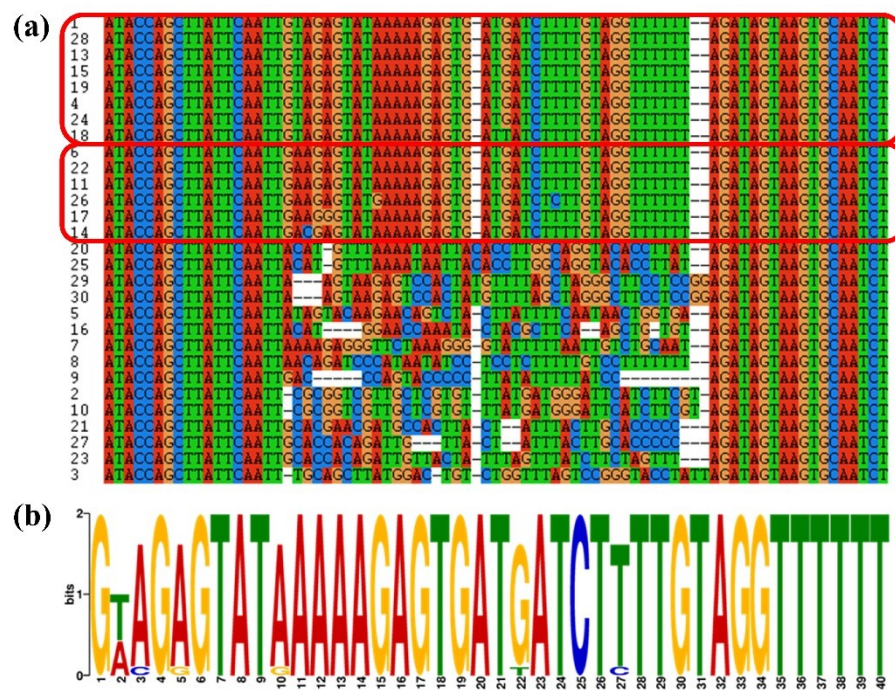

**Figure S1.** Sequences alignment analysis result by Clustalx 1.8.3 (a) and MEME Suite (b).

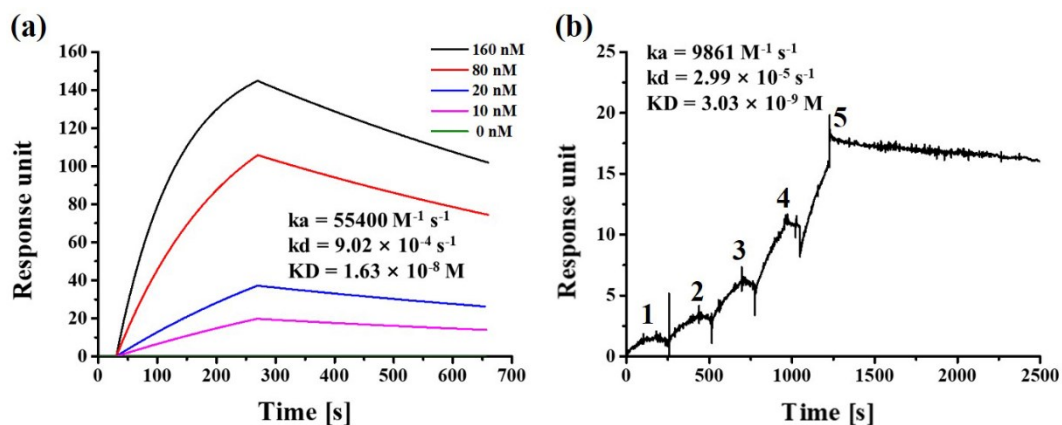

**Figure S2** Affinity analysis of aptamer PL1 and antibody atezolizumab interacted with PD-L1 by SPR. SPR sensorgram (a) demonstrated interaction of different concentrations of aptamer PL1 (10 nM, 20 nM, 80 nM and 160 nM) with PD-L1 protein. SPR sensorgram (b) demonstrated interaction of different concentrations of antibody atezolizumab with PD-L1 protein: (1) 25 nM, (2) 50 nM, (3) 100 nM, (4) 200 nM and (5) 400 nM.

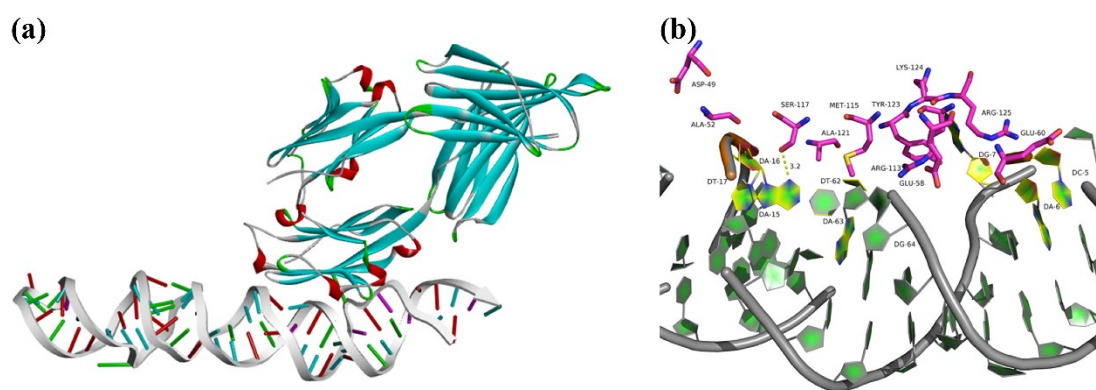

**Figure S3** The docking stimulation for the complex structure of aptamer PL1 and PD-L1 protein (PDB: 4Z18) (a) and the analysis of interaction sites (b).

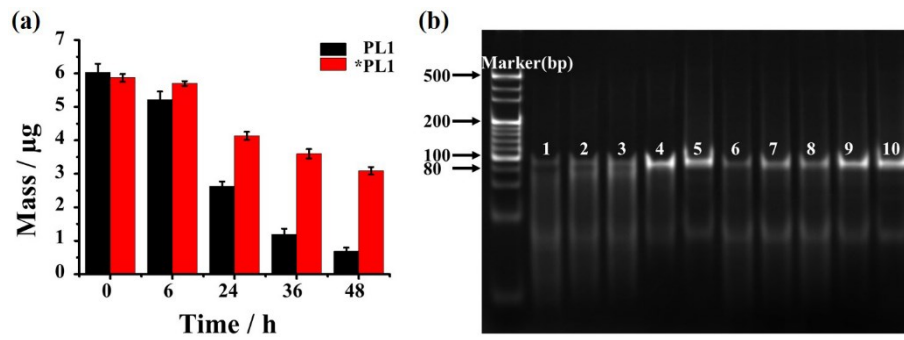

**Figure S4.** The serum stability of free aptamer PL1 (PL1) and phosphorothioate modified aptamer PL1 (\*PL1) in 10% FBS at 37 °C for 0, 6, 24, 36 and 48 h was evaluated by ultrafiltration centrifuge (a) and native PAGE using 12% polyacrylamide gel (b). The 1-5 and 6-10 bands represent the free PL1 and phosphorothioate modified aptamer PL1 (\*PL1) respectively at 48, 36, 24, 6 and 0 h.

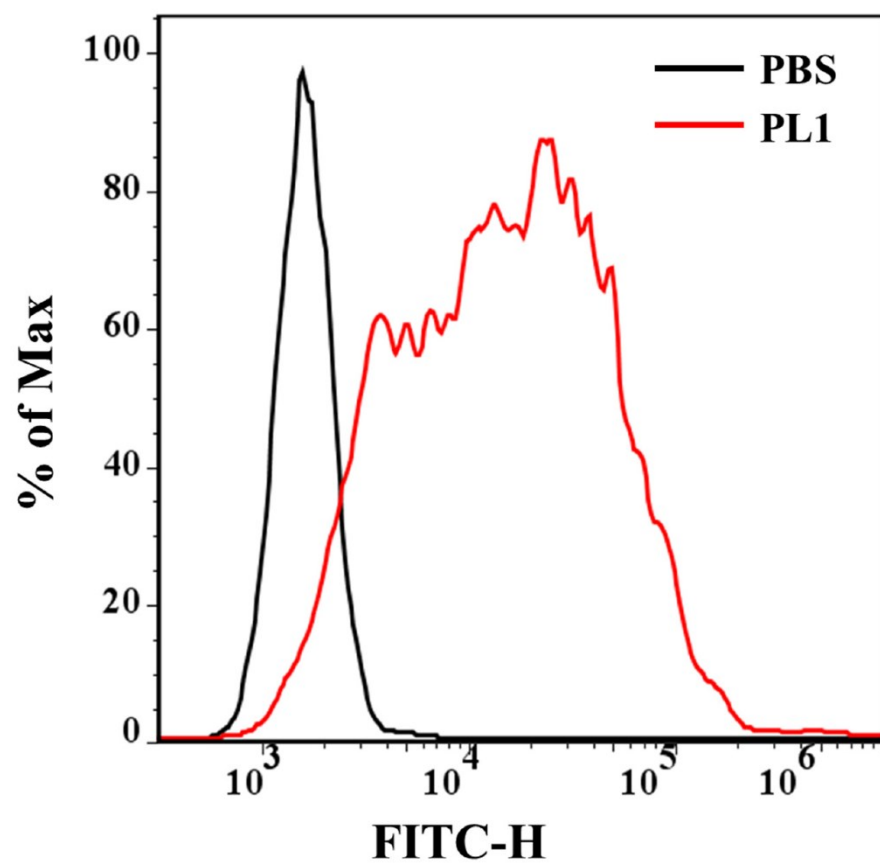

**Figure S5.** Binding assays of selected aptamer PL1 with CT26 cells.

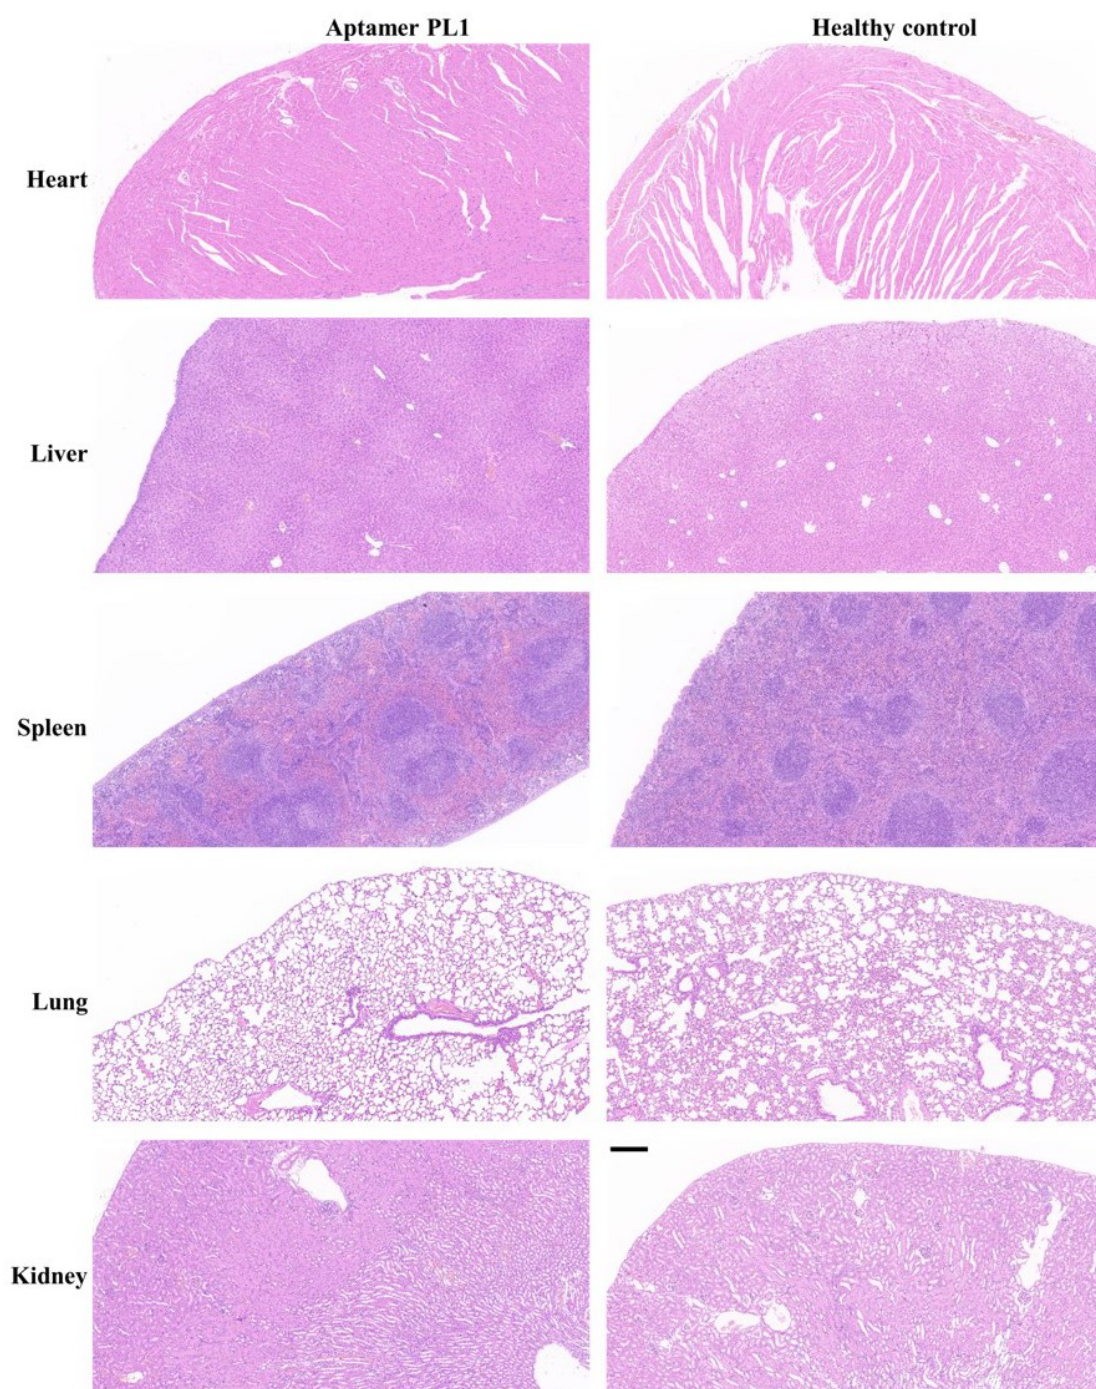

**Fig. S6** The HE staining of the tissues from the healthy mice and PL1-treated mice. The scale bar in the images is 200  $\mu\text{m}$ .
